# Supplementary material
Source: MDPI journal article supplement (https://www.mdpi.com/2304-6732/9/7/482)
Supplement: s1 [file s1]

## Supplementary Material

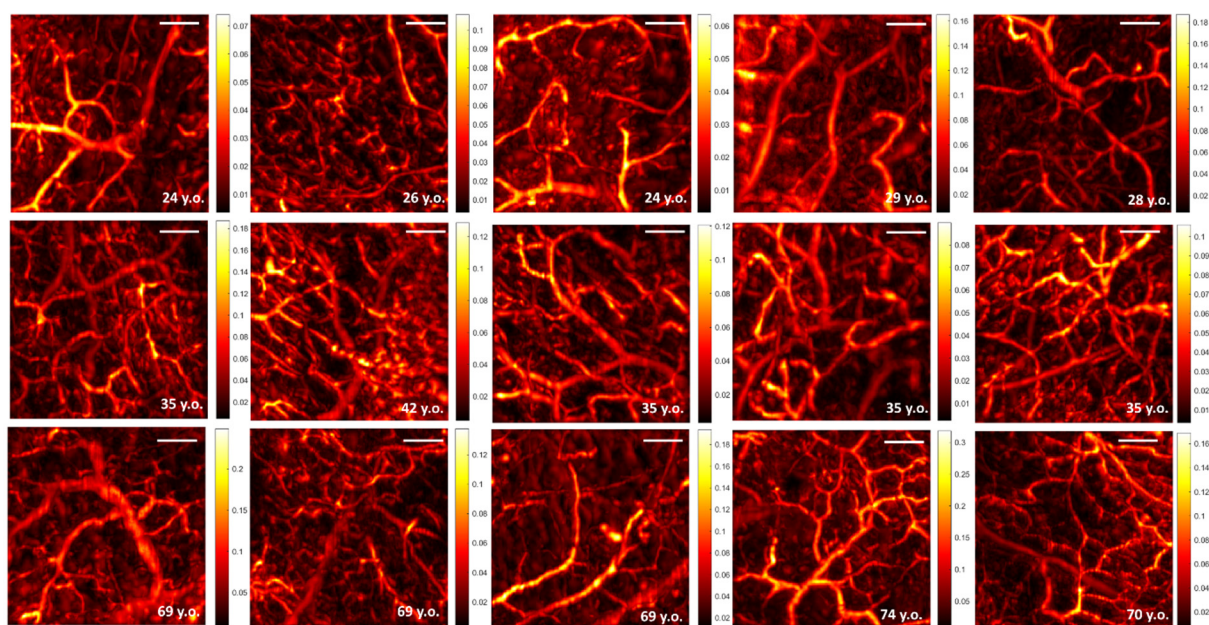

**Figure S1.** OA angiograms built in the projection of the maximum amplitude onto the skin surface of palms of healthy volunteers from groups 1 (first raw), group 2 (second raw) and group 3 (third raw). All bars are 1 mm.
